# Supplementary figures and images for: A Model for the Production of Regulatory Grade Viral Hemorrhagic Fever Exposure Stocks: From Field Surveillance to Advanced Characterization of SFTSV
Source: MDPI journal article supplement (doi:10.3390/v12090958), 2020-08-29

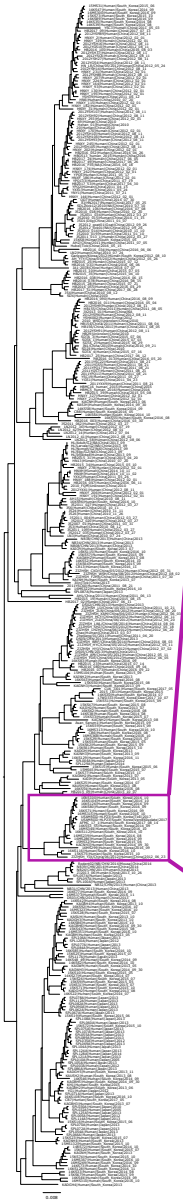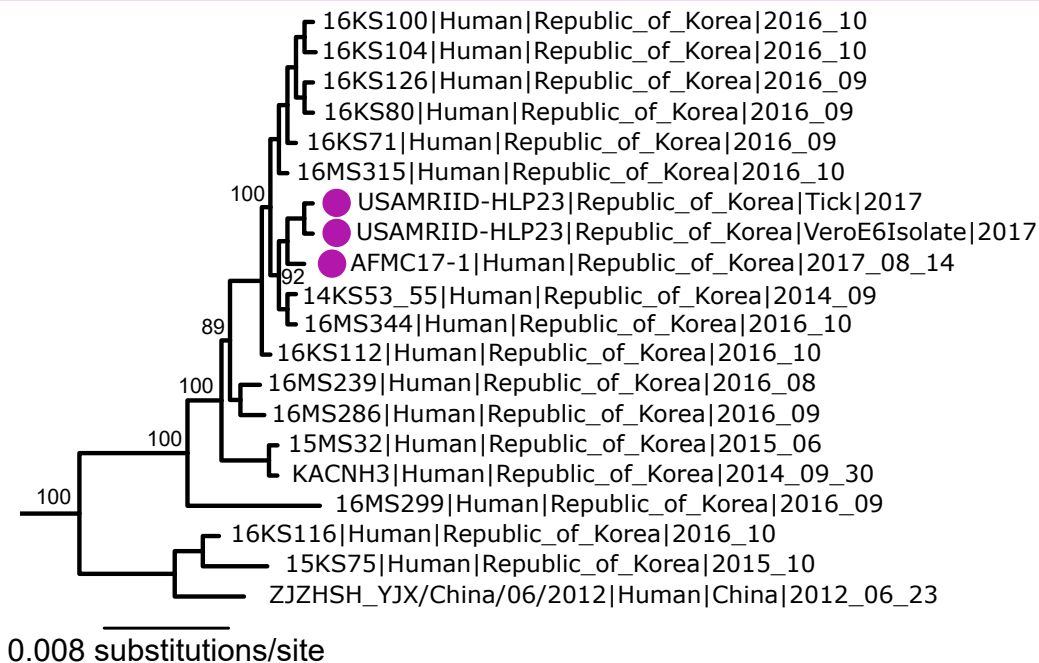

Supplement: s1 [file s1]
